# Supplementary material for: A covalent organic polymer for turn-on fluorescence sensing of hydrazine
Source: Royal Society of Chemistry journal article supplement (doi:10.1039/d1tc04335h), 2021-12-15
Supplement: d1tc04335h1.pdf [file d1tc04335h1.pdf]

## **Electronic Supporting Information**

### **A Covalent Organic Polymer as Turn-on Fluorescence Sensor for Hydrazine Detection**

Jiangpeng Wang,<sup>#a</sup> Canran Wang,<sup>#a</sup> Shan Jiang,<sup>a,b</sup> Wenyue Ma,<sup>a</sup> Bin Xu,<sup>a</sup> Leijing Liu<sup>\*a</sup> and  
Wenjing Tian<sup>\*a</sup>

<sup>a</sup> State Key Laboratory of Supramolecular Structure and Materials, Jilin University,  
Changchun 130012, P. R. China. E-mail: liuleijing@jlu.edu.cn, wjtian@jlu.edu.cn

<sup>b</sup> College of Chemistry and Chemical Engineering Liaoning Normal University,  
Dalian 116029, P. R. China

<sup>#</sup> These authors contributed equally to this work.

## Supplementary Figures

Fig. S1-S4 show the  $^1\text{H}$  NMR and mass spectra of TPE-(Si) $_4$  and TPE-Al, respectively.

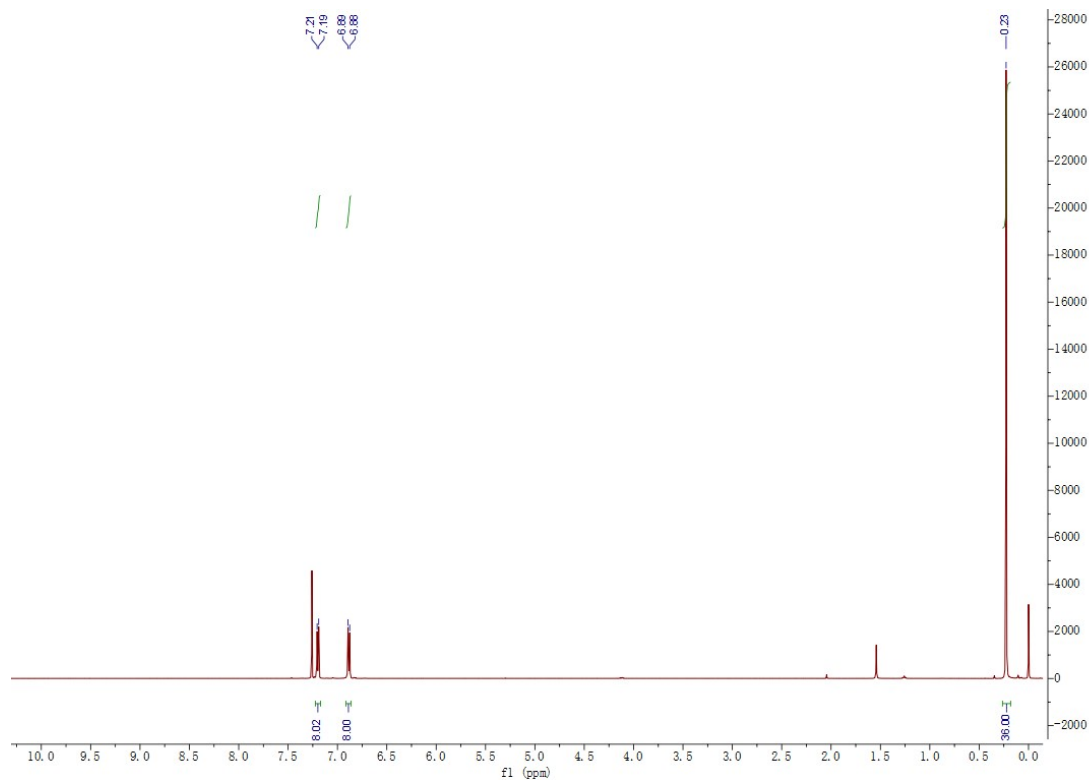

**Fig. S1**  $^1\text{H}$  NMR spectrum of TPE-(Si) $_4$ .

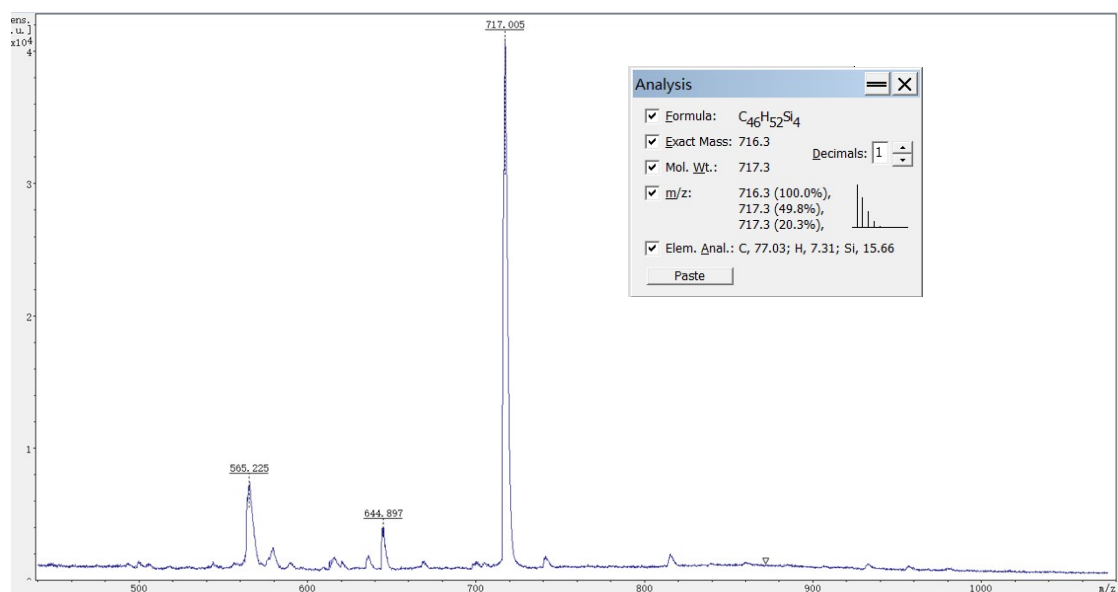

**Fig. S2** Mass spectrum of TPE-(Si) $_4$ .

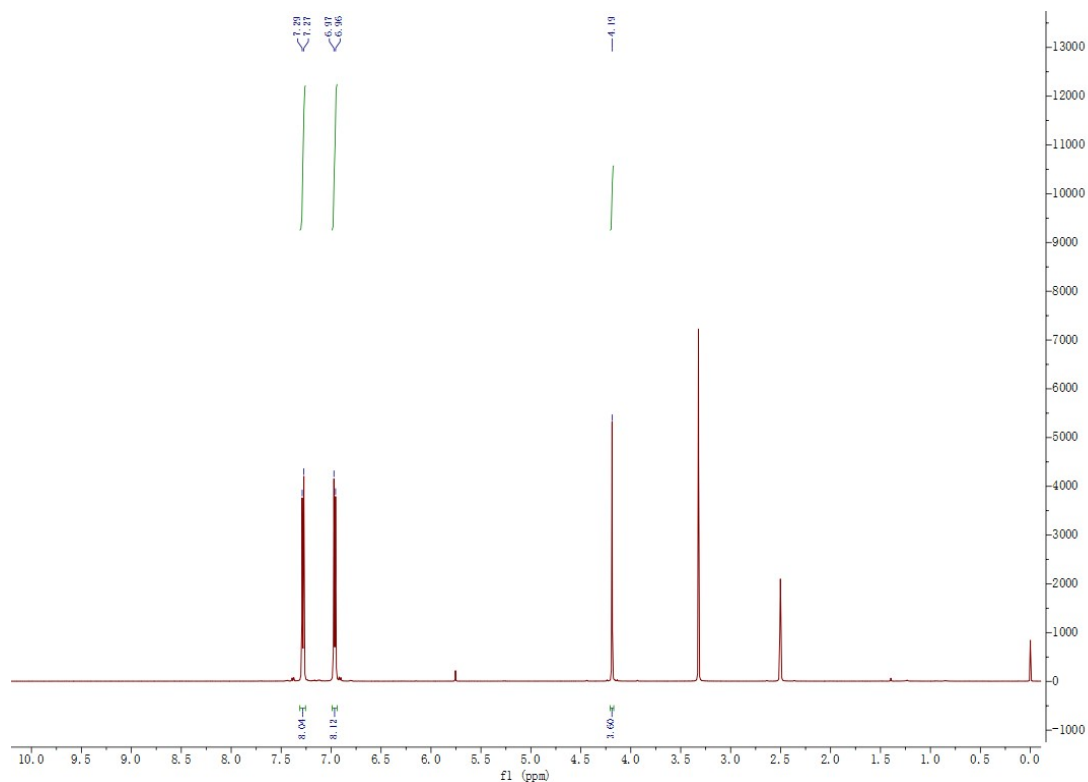

**Fig. S3**  $^1\text{H}$  NMR spectrum of TPE-Al.

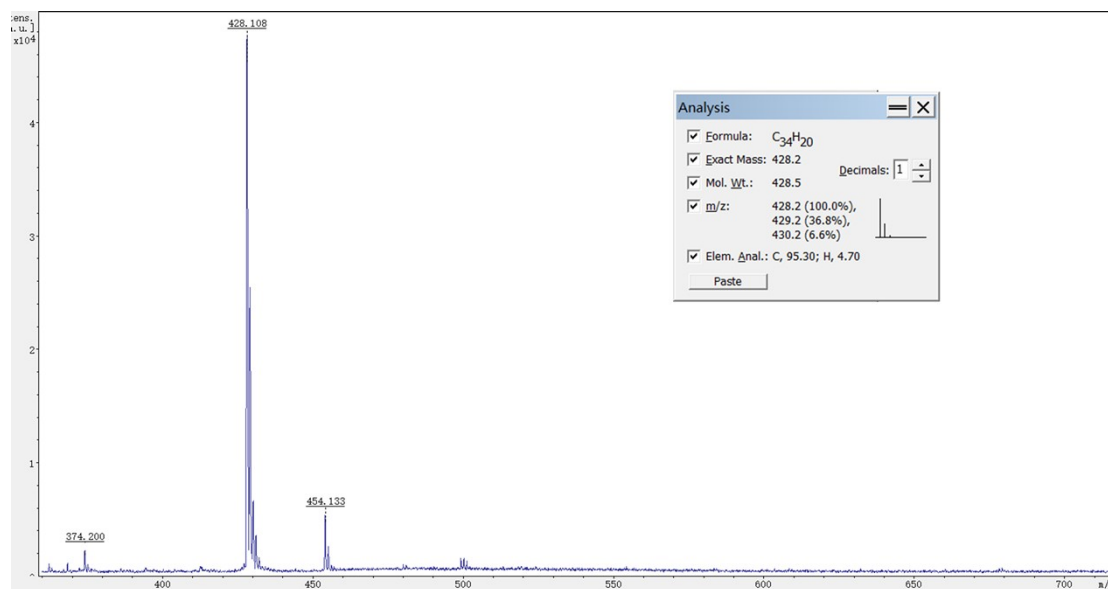

**Fig. S4** Mass spectrum of TPE-Al.

Fig. S5 shows the powder X-Ray diffraction (PXRD) pattern of COP-Ta. It can be observed that there is no obvious crystallization peak, indicating that COP-Ta is an amorphous polymer.

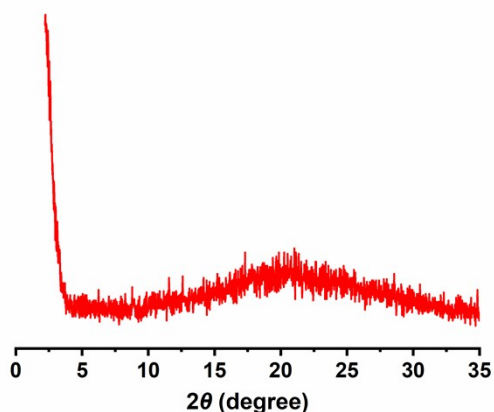

**Fig. S5** PXRD pattern of COP-Ta.

The scanning electron microscopy (SEM) and transmission electron microscope (TEM) images are shown in Fig. S6. The random block morphology can be observed in the SEM image of COP-Ta (Fig. S6a). From the transmission electron microscope image (Fig. S6b), a flaky stacking structure can be observed.

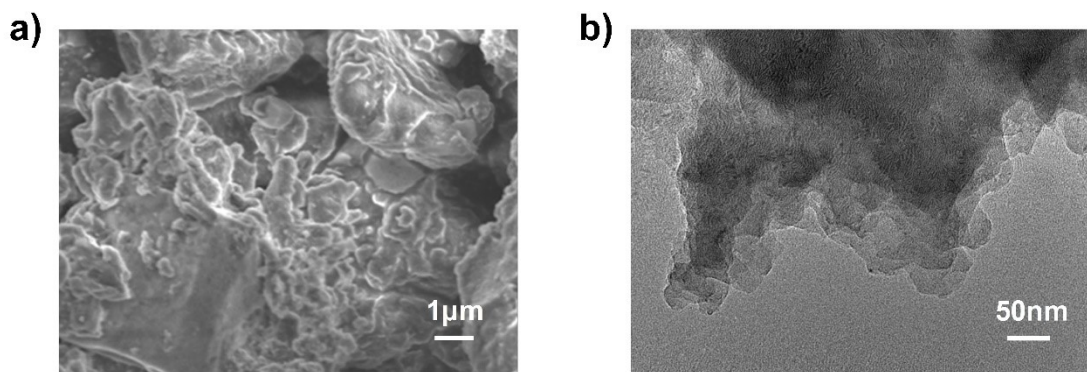

**Fig. S6** a) SEM and b) TEM images of COP-Ta.

Fig. S7 shows the TGA curve of COP-Ta from room temperature to 800  $^\circ\text{C}$  in  $\text{N}_2$  atmosphere. COP-Ta has almost no weight loss before 300  $^\circ\text{C}$ ; After 300  $^\circ\text{C}$ , COP-Ta begins to lose weight gradually. When the temperature rises to 450  $^\circ\text{C}$ , the weight loss of COP-Ta is only 10%. Finally, when the temperature rises to 800  $^\circ\text{C}$ , COP-Ta

decomposes only a small part. All these phenomena show that the polymer has an excellent thermal stability.

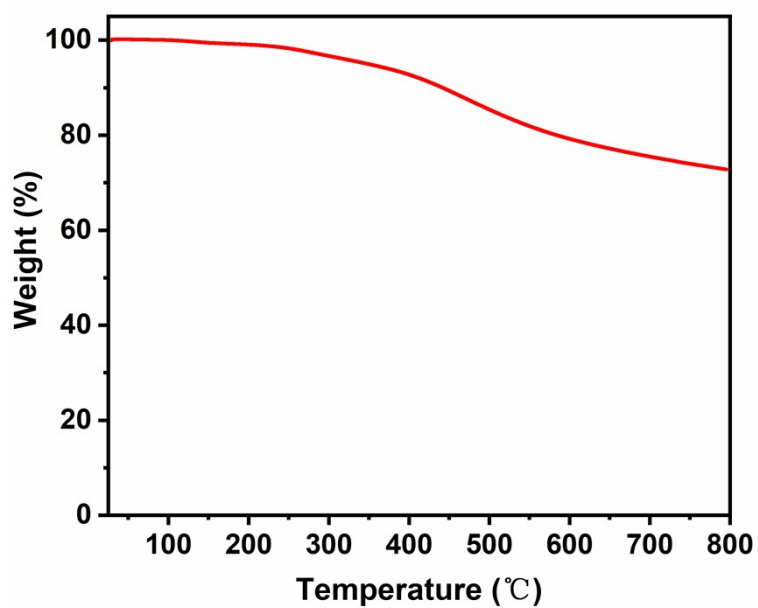

**Fig. S7** TGA curve of COP-Ta.

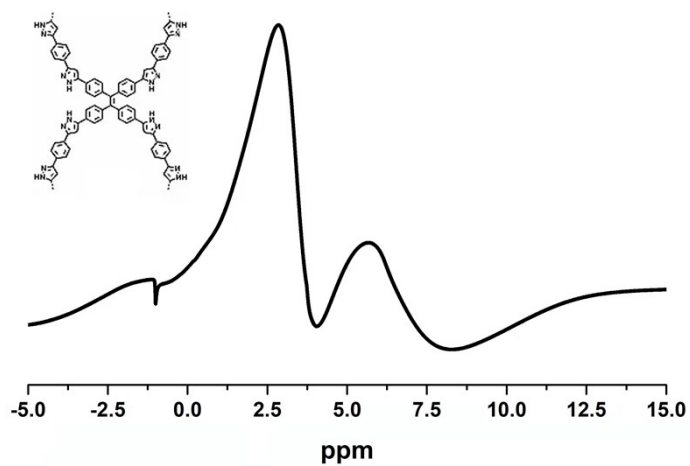

**Fig. S8** Solid-state  $^1\text{H}$  NMR spectrum of COP-Ta after hydrazine addition.
